# Supplementary material
Source: PubMed Central journal article supplement (PMC8375261)
Supplement: NIHMS1727111-supplement-1.pdf [file NIHMS1727111-supplement-1.pdf]

498 **Supplement 1.** Compartment-specific differences in OARSI joint space narrowing and osteophyte grades

|                                           | ACL reconstructed knee | Contralateral knee |
|-------------------------------------------|------------------------|--------------------|
| OARSI medial joint space narrowing grade  |                        |                    |
| 0                                         | 111 (83%)              | 126 (95%)          |
| 1                                         | 19 (14%)               | 6 (5%)             |
| 2                                         | 2 (2%)                 | 1 (1%)             |
| 3                                         | 1 (1%)                 | 0 (0%)             |
| OARSI lateral joint space narrowing grade |                        |                    |
| 0                                         | 119 (89%)              | 132 (99%)          |
| 1                                         | 11 (8%)                | 1 (1%)             |
| 2                                         | 2 (2%)                 | 0 (0%)             |
| 3                                         | 1 (1%)                 | 0 (0%)             |
| OARSI medial femoral osteophyte grade     |                        |                    |
| 0                                         | 126 (95%)              | 133 (100%)         |
| 1                                         | 6 (5%)                 | 0 (0%)             |
| 2                                         | 1 (1%)                 | 0 (0%)             |
| 3                                         | 0 (0%)                 | 0 (0%)             |
| OARSI lateral femoral osteophyte grade    |                        |                    |
| 0                                         | 116 (87%)              | 131 (98%)          |
| 1                                         | 14 (11%)               | 1 (1%)             |
| 2                                         | 2 (2%)                 | 0 (0%)             |
| 3                                         | 1 (1%)                 | 1 (1%)             |
| OARSI medial tibial osteophyte grade      |                        |                    |
| 0                                         | 95 (71%)               | 126 (95%)          |
| 1                                         | 29 (22%)               | 6 (5%)             |
| 2                                         | 9 (7%)                 | 1 (1%)             |
| 3                                         | 0 (0%)                 | 0 (0%)             |
| OARSI lateral tibial osteophyte grade     |                        |                    |
| 0                                         | 102 (77%)              | 126 (95%)          |
| 1                                         | 27 (20%)               | 6 (5%)             |
| 2                                         | 3 (2%)                 | 0 (0%)             |
| 3                                         | 1 (1%)                 | 1 (1%)             |

499 Key: reported as number (percentage)

500

501

502

503

504

505

506 **Supplement 2.** Compartment specific side-to-side differences in OARSI joint space narrowing and  
 507 osteophyte grades

|                                                                          | Number (percentage) |
|--------------------------------------------------------------------------|---------------------|
| OARSI medial JSN grade difference                                        |                     |
| 0 grades                                                                 | 115 (86%)           |
| 1 grade                                                                  | 16 (12%)            |
| 2 grades                                                                 | 2 (2%)              |
| 3 grades                                                                 | 0 (0%)              |
| OARSI lateral JSN grade difference                                       |                     |
| 0 grades                                                                 | 118 (89%)           |
| 1 grade                                                                  | 12 (9%)             |
| 2 grades                                                                 | 2 (2%)              |
| 3 grades                                                                 | 1 (1%)              |
| OARSI medial compartment (femoral + tibial osteophyte grade) difference  |                     |
| 0 grades                                                                 | 100 (75%)           |
| 1 grade                                                                  | 22 (17%)            |
| 2 grades                                                                 | 9 (7%)              |
| 3+ grades                                                                | 2 (2%)              |
| OARSI lateral compartment (femoral + tibial osteophyte grade) difference |                     |
| 0 grades                                                                 | 102 (77%)           |
| 1 grade                                                                  | 20 (15%)            |
| 2 grades                                                                 | 9 (7%)              |
| 3+ grades                                                                | 2 (1%)              |

508

509
